# Supplementary material for: Clinical effectiveness of convalescent plasma in hospitalized patients with COVID-19: a systematic review and meta-analysis
Source: PubMed Central journal article supplement — Ther Adv Respir Dis. 2021 Jun 30;15:17534666211028077. doi: 10.1177/17534666211028077 (PMC8252450; doi:10.1177/17534666211028077), 2021-06-30
Supplement: sj-pdf-4-tar-10.1177_17534666211028077.pdf [file sj-pdf-4-tar-10.1177_17534666211028077.pdf]

Reviewer 2 v.1

Comments to the Author

I dont think that there is need of including supplemntary fiels in the review article documment this much detail like the list of excluded refrences.
